# Supplementary material for: Mealworm hydrolysate ameliorates dexamethasone-induced muscle atrophy via sirtuin 1-mediated signaling and Akt pathway
Source: Springer Nature journal article supplement (doi:10.1038/s41538-025-00432-9), 2025-05-13
Supplement: MOESM1 [file 41538_2025_432_MOESM1_ESM.pdf]

## Supplementary Figures

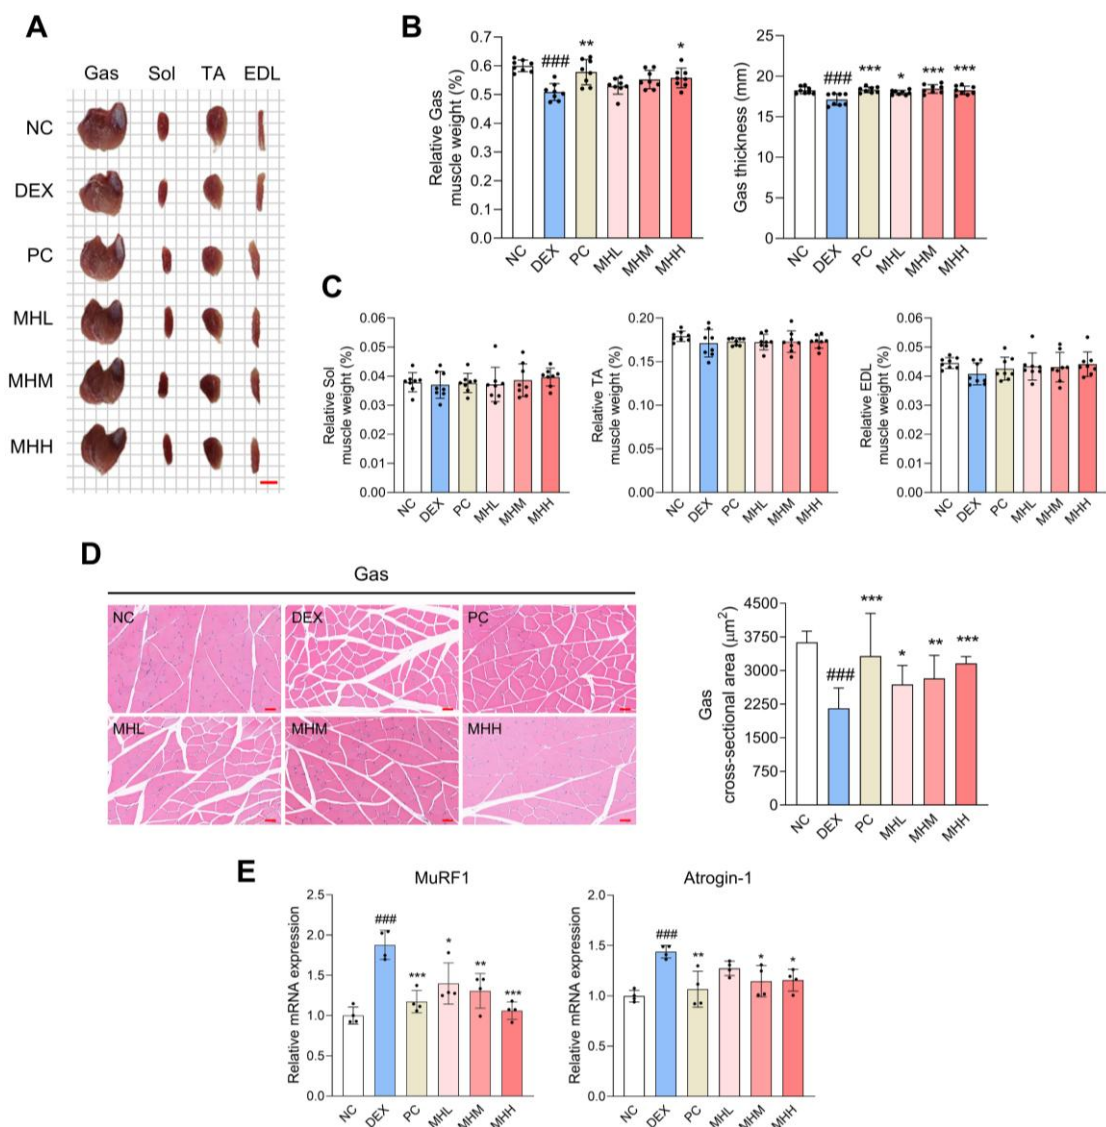

**Fig. S1. Effects of MH on the Gas, Sol, TA, and EDL muscles in DEX-treated rats.** Male SD rats were injected with DEX for one week, followed by oral treatment with oxymetholone (50 mg/kg/day) and MH (100, 200, and 400 mg/kg/day) for four weeks. **(A)** Representative images of the Gas, Sol, TA, and EDL muscles. The scale bar indicates 1 cm. **(B)** The relative weight and thickness of the Gas muscles ( $n = 8$ ). **(C)** The relative weight of the Sol, TA, and EDL muscles ( $n = 8$ ). **(D)** CSA of the Gas muscle fibers. Magnification  $\times 200$ . The scale bar indicates  $50 \mu\text{m}$ . **(E)** mRNA expression levels of MuRF1 and atrogin-1 in the Gas muscles. All

experiments were repeated at least three times. Data are presented as the mean  $\pm$  SD. MH, mealworm hydrolysate; DEX, dexamethasone; Gas, gastrocnemius; Sol, soleus; TA, tibialis anterior; EDL, extensor digitorum longus; n.s., not significant

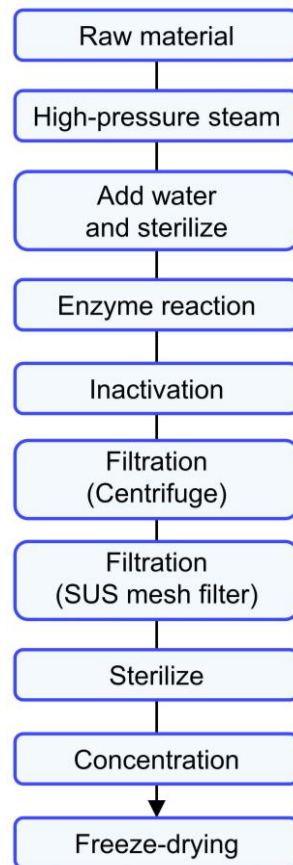

**Fig. S2. Standard production procedure for MH production.**

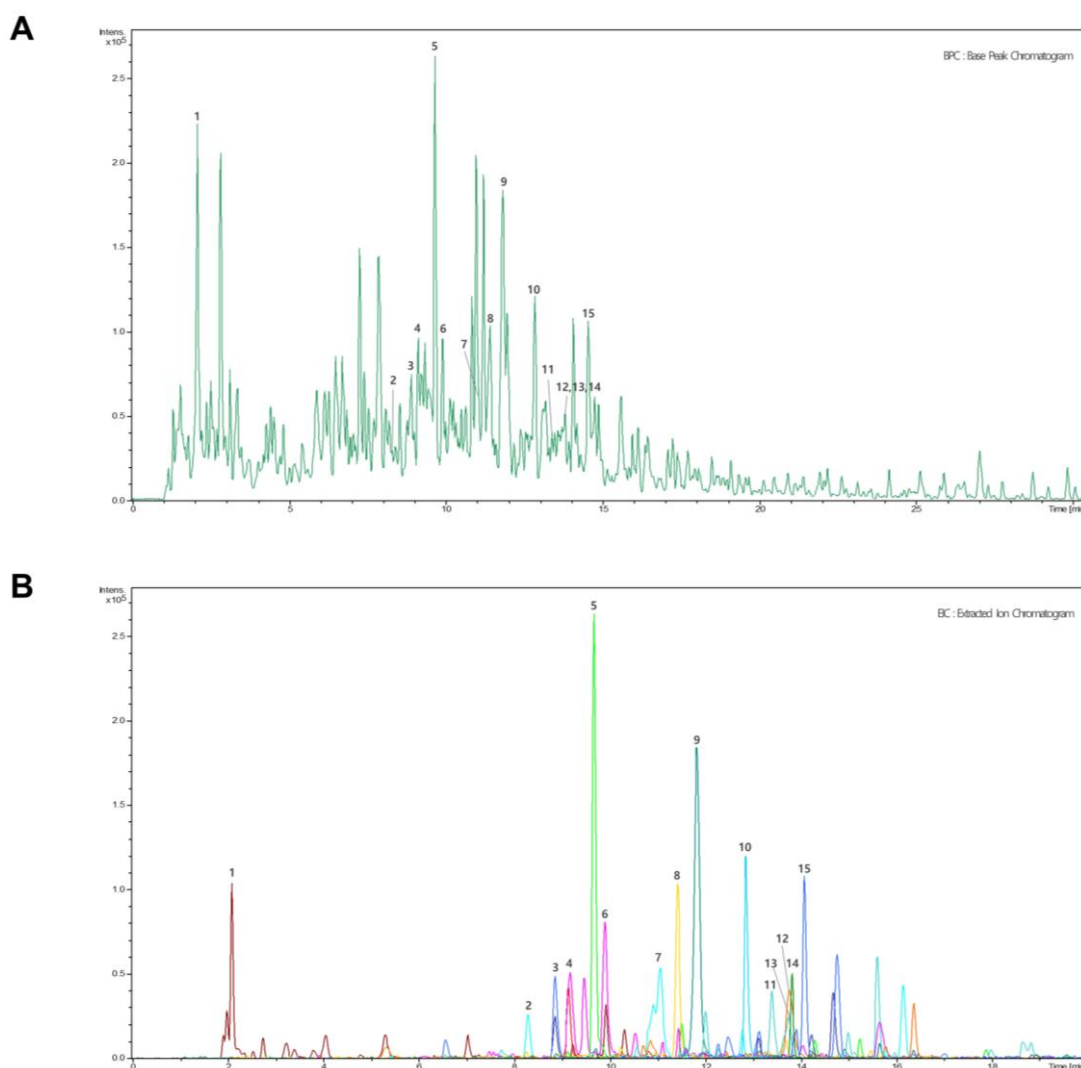

**Fig. S3. Fifteen peptides were identified from MH, and peptides 5, 6, 8, 9, and 15 were selected for molecular docking analysis based on the intensity, resolution, and symmetry of the peaks. (A) LC/MS base peak chromatogram (BPC) and (B) extracted ion chromatogram (EIC) of MH. Peptide 1, m/z 345.23, AVR; Peptide 2, m/z 579.32, AAPLAH; Peptide 3, m/z 598.36, AAPLAR; Peptide 4, m/z 609.33, HAPVVS; Peptide 5, m/z 406.79, REPLVAK; Peptide 6, m/z 428.25, AVAPA; Peptide 7, m/z 499.29, AAPAVA/AAPAAV, Peptide 8, m/z 421.21, AAPY; Peptide 9, m/z 435.24, TEAPLNPK; Peptide 10, m/z 554.33, HALLT; Peptide 11, m/z 527.32, AAPVVA/AAPVAV; Peptide 12, m/z 513.30, AAPALA/AAPAAL; Peptide 13, m/z 527.32, APVAVA/APVAAV; Peptide 14, m/z 413.26,**

VAAPVAVAK; Peptide 15, m/z 456.28, VAAPV. A, alanine; E, glutamic acid; H, histidine; K, lysine; L, leucine; N, asparagine; P, proline; R, arginine; S, serine; T, threonine; V, valine; Y, tyrosine; MH, mealworm hydrolysate

## Supplementary Tables

**Table S1.** Docking score of MH-derived peptides with SIRT1

| Sequence of MH-derived peptide | SIRT1 with substrate peptide (kcal/mol) |
|--------------------------------|-----------------------------------------|
| AAPY                           | −14.01                                  |
| AVAPA                          | −12.49                                  |
| VAAPV                          | −11.35                                  |
| RQPLVAK                        | −9.38                                   |
| RQPIVAK                        | −10.24                                  |
| TEAPLNPK                       | −10.21                                  |
| TEAPINPK                       | −9.48                                   |

As leucine and isoleucine have the same mass, the two peptides, RQPLVAK (Arg-Gln-Pro-Leu-Val-Ala-Lys) and TEAPLNPK (Thr-Glu-Ala-Pro-Leu-Asn-Pro-Lys), were also evaluated as RQPIVAK (Arg-Gln-Pro-Ile-Val-Ala-Lys) and TEAPINPK (Thr-Glu-Ala-Pro-Ile-Asn-Pro-Lys), respectively. A, alanine; P, proline; Y, tyrosine; V, valine; R, arginine; Q, glutamine; L, leucine; K, lysine; I, isoleucine; T, threonine; E, glutamic acid; N, asparagine

**Table S2.** Serum biochemical parameters in DEX-treated rats ( $n = 8$ )

|                         | NC                              | DEX            | PC                | MHL           | MHM            | MHH            |
|-------------------------|---------------------------------|----------------|-------------------|---------------|----------------|----------------|
| AST (U/L)               | 101.43 ±<br>19.65 <sup>NS</sup> | 104.29 ± 13.46 | 105.86 ±<br>25.40 | 106.86 ± 8.13 | 105.00 ± 11.98 | 100.14 ± 24.40 |
| ALT (U/L)               | 36.00 ±<br>9.45 <sup>NS</sup>   | 35.71 ± 5.59   | 36.71 ± 4.39      | 36.43 ± 4.12  | 35.00 ± 5.40   | 34.14 ± 4.98   |
| Total protein<br>(g/dL) | 6.16 ± 0.5 <sup>NS</sup>        | 6.26 ± 0.15    | 6.27 ± 0.17       | 6.23 ± 0.32   | 6.14 ± 0.26    | 6.23 ± 0.20    |
| Albumin<br>(g/dL)       | 4.44 ± 0.36 <sup>NS</sup>       | 4.46 ± 0.16    | 4.46 ± 0.16       | 4.39 ± 0.22   | 4.33 ± 0.20    | 4.31 ± 0.17    |
| BUN<br>(mg/dL)          | 10.74 ±<br>1.21 <sup>NS</sup>   | 12.34 ± 1.60   | 11.23 ± 1.28      | 10.69 ± 1.25  | 10.97 ± 1.41   | 11.04 ± 0.88   |
| Creatinine<br>(mg/dL)   | 0.41 ± 0.06 <sup>NS</sup>       | 0.42 ± 0.06    | 0.43 ± 0.02       | 0.42 ± 0.05   | 0.39 ± 0.02    | 0.42 ± 0.07    |

Data are presented as the mean ± SD. NC, normal control; DEX, DEX-treated control; PC, positive control, DEX treatment with 50 mg/kg oxymetholone; MHL, DEX treatment with 100 mg/kg MH; MHM, DEX treatment with 200 mg/kg MH; MHH, DEX treatment with 400 mg/kg MH. AST, aspartate transaminase; ALT, alanine transaminase; BUN, blood urea nitrogen; NS, not significant

**Table S3.** Amino acid sequences of fifteen peptides derived from MH

| Peak No.  | RT (min)    | Charge   | m/z           | Sequence          |
|-----------|-------------|----------|---------------|-------------------|
| 1         | 2.1         | 1        | 345.23        | AVR               |
| 2         | 8.3         | 1        | 579.32        | AAPLAH            |
| 3         | 8.8         | 1        | 598.36        | AAPLAR            |
| 4         | 9.1         | 1        | 609.33        | HAPVVS            |
| <b>5</b>  | <b>9.7</b>  | <b>2</b> | <b>406.79</b> | <b>REPLVAK</b>    |
| <b>6</b>  | <b>9.9</b>  | <b>1</b> | <b>428.25</b> | <b>AVAPA</b>      |
| 7         | 11.0        | 1        | 499.29        | AAPAVA/<br>AAPAAV |
| <b>8</b>  | <b>11.4</b> | <b>1</b> | <b>421.21</b> | <b>AAPY</b>       |
| <b>9</b>  | <b>11.8</b> | <b>2</b> | <b>435.24</b> | <b>TEAPLNPK</b>   |
| 10        | 12.8        | 1        | 554.33        | HALLT             |
| 11        | 13.4        | 1        | 527.32        | AAPVVA/<br>AAPVAV |
| 12        | 13.7        | 1        | 513.30        | AAPALA/<br>AAPAAL |
| 13        | 13.7        | 1        | 527.32        | APVAVA/<br>APVAAV |
| 14        | 13.8        | 2        | 413.26        | VAAPVAVAK         |
| <b>15</b> | <b>14.0</b> | <b>1</b> | <b>456.28</b> | <b>VAAPV</b>      |

Peptides 5, 6, 8, 9, and 15 were employed in the molecular docking study. A, alanine; E, glutamic acid; H, histidine; K, lysine; L, leucine; N, asparagine; P, proline; R, arginine; S, serine; T, threonine; V, valine; Y, tyrosine



**Table S4.** List of antibodies used for western blotting

| Antibody                          | Supplier                  | Source | Cat. No. |
|-----------------------------------|---------------------------|--------|----------|
| MyHC                              | R&D systems               | Mouse  | MAB4470  |
| SIRT1                             | Cell Signaling Technology | Rabbit | 9475     |
| p-Akt (T308)                      | Cell Signaling Technology | Rabbit | 13038    |
| Akt                               | Cell Signaling Technology | Rabbit | 9272     |
| p-FOXO3a (S253)                   | Cell Signaling Technology | Rabbit | 9466     |
| FOXO3a                            | Cell Signaling Technology | Rabbit | 2497     |
| MuRF1                             | Abcam                     | Rabbit | ab183094 |
| Atrogin-1                         | Abcam                     | Rabbit | ab168372 |
| p-mTOR (S2448)                    | Cell Signaling Technology | Rabbit | 5536     |
| mTOR                              | Cell Signaling Technology | Rabbit | 2972     |
| p-p70S6K (T389)                   | Cell Signaling Technology | Rabbit | 9205     |
| p70S6K                            | Cell Signaling Technology | Rabbit | 9202     |
| p-4E-BP1 (T37/46)                 | Cell Signaling Technology | Rabbit | 2855     |
| 4E-BP1                            | Cell Signaling Technology | Rabbit | 9644     |
| Cleaved caspase-3                 | Cell Signaling Technology | Rabbit | 9661     |
| Bax                               | Cell Signaling Technology | Rabbit | 2772     |
| Bcl-2                             | Abcam                     | Rabbit | ab182858 |
| p-AMPK (T172)                     | Cell Signaling Technology | Rabbit | 2535     |
| AMPK                              | Cell Signaling Technology | Rabbit | 2532     |
| PGC-1 $\alpha$                    | Bioss                     | Rabbit | bs-7535R |
| UCP3                              | Abcam                     | Rabbit | ab180643 |
| GAPDH                             | Cell Signaling Technology | Rabbit | 5174     |
| Anti-Rabbit IgG, HRP<br>Conjugate | Promega                   | Goat   | W4011    |
| Anti-Mouse IgG, HRP<br>Conjugate  | Promega                   | Goat   | W4021    |

**Table S5.** List of primer sequences used for real-time RT-PCR

| Genes     | Accession Number | Primer Sequence (5'–3')  | Product length |
|-----------|------------------|--------------------------|----------------|
| MuRF1     | NM_080903.2      | F: GCCATCCTGGACGAGAAGAAG | 194            |
|           |                  | R: AGCGGCTTGGCACTCAAG    |                |
|           |                  | F: CCAGAGAGTCGGCAAGTC    |                |
| Atrogin-1 | NM_133521.2      | R: CAGGTCGGTGATCGTGAG    | 142            |
|           |                  | R: GCGTTGCCAGAAGTGAAGCCA |                |
|           |                  | F: CTGCACCACCAACTGCTTAG  |                |
| GAPDH     | NM_017008.4      | R: GGATGCAGGGATGATGTTCT  | 178            |
|           |                  |                          |                |

Original blots

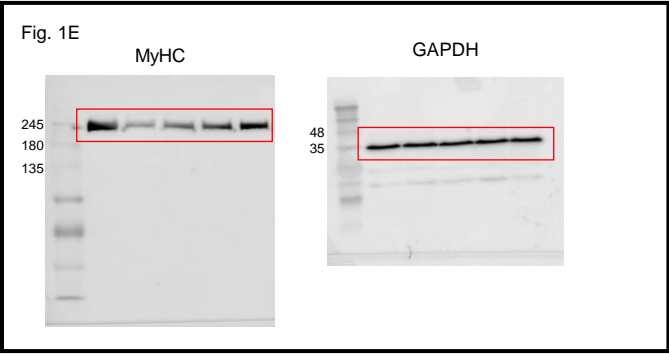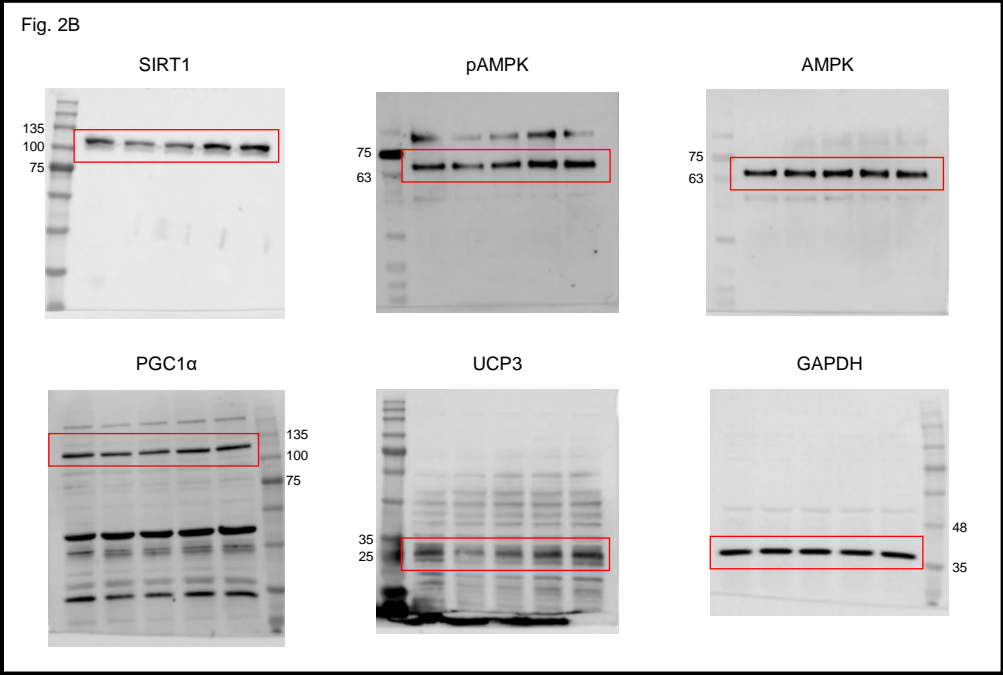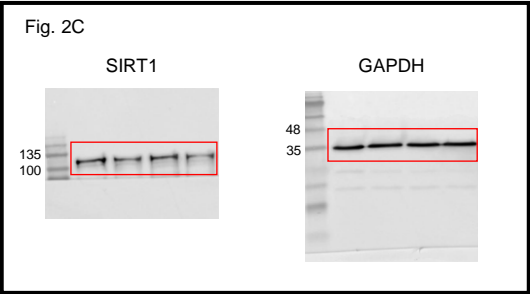

Fig. 3A

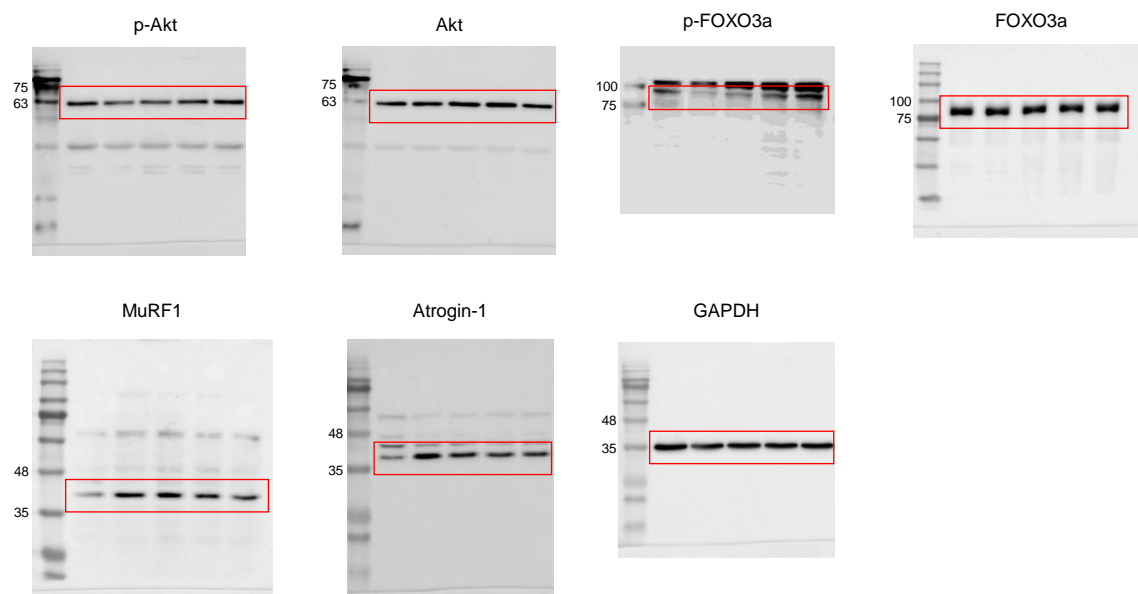

Fig. 3B

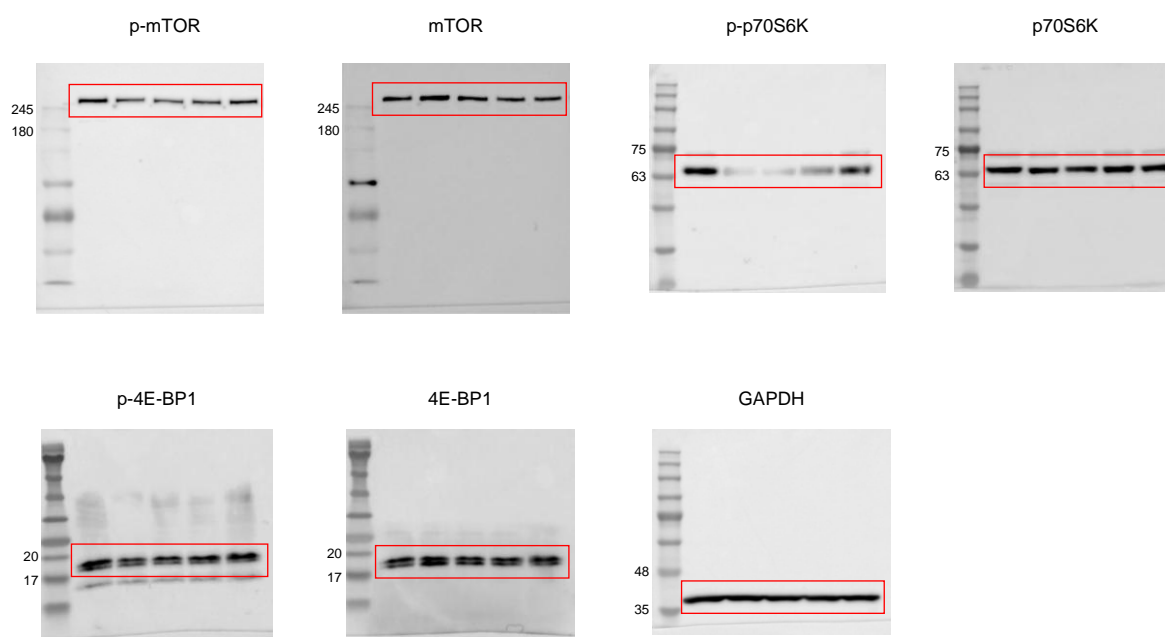

Fig. 3C

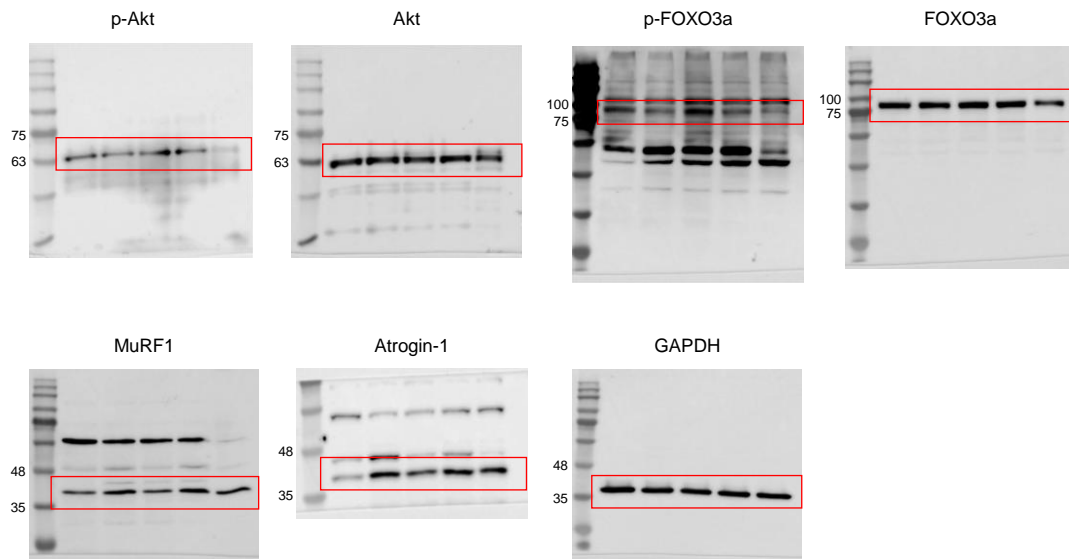

Fig. 3D

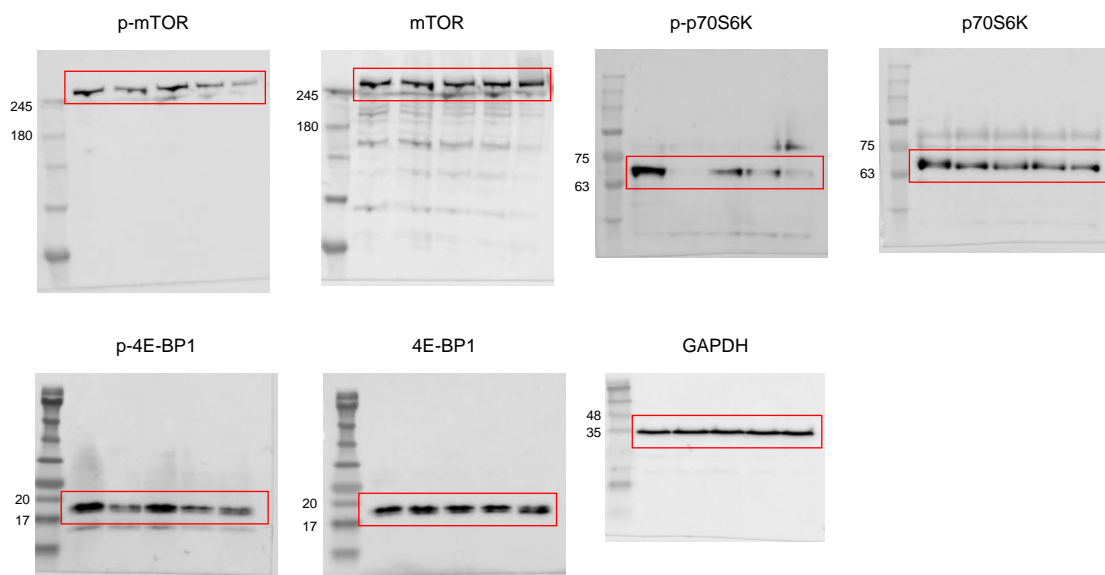

Fig. 4A

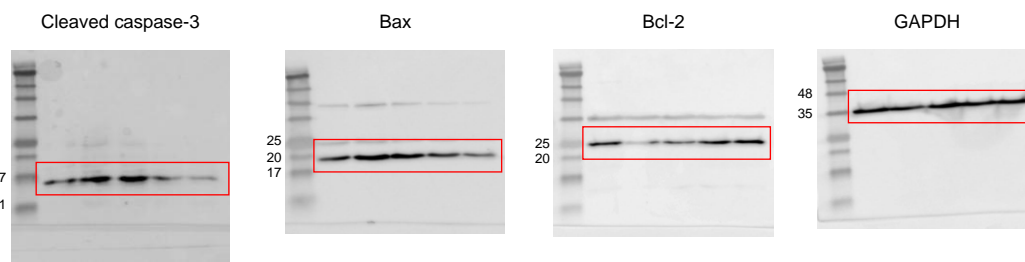

Fig. 6B

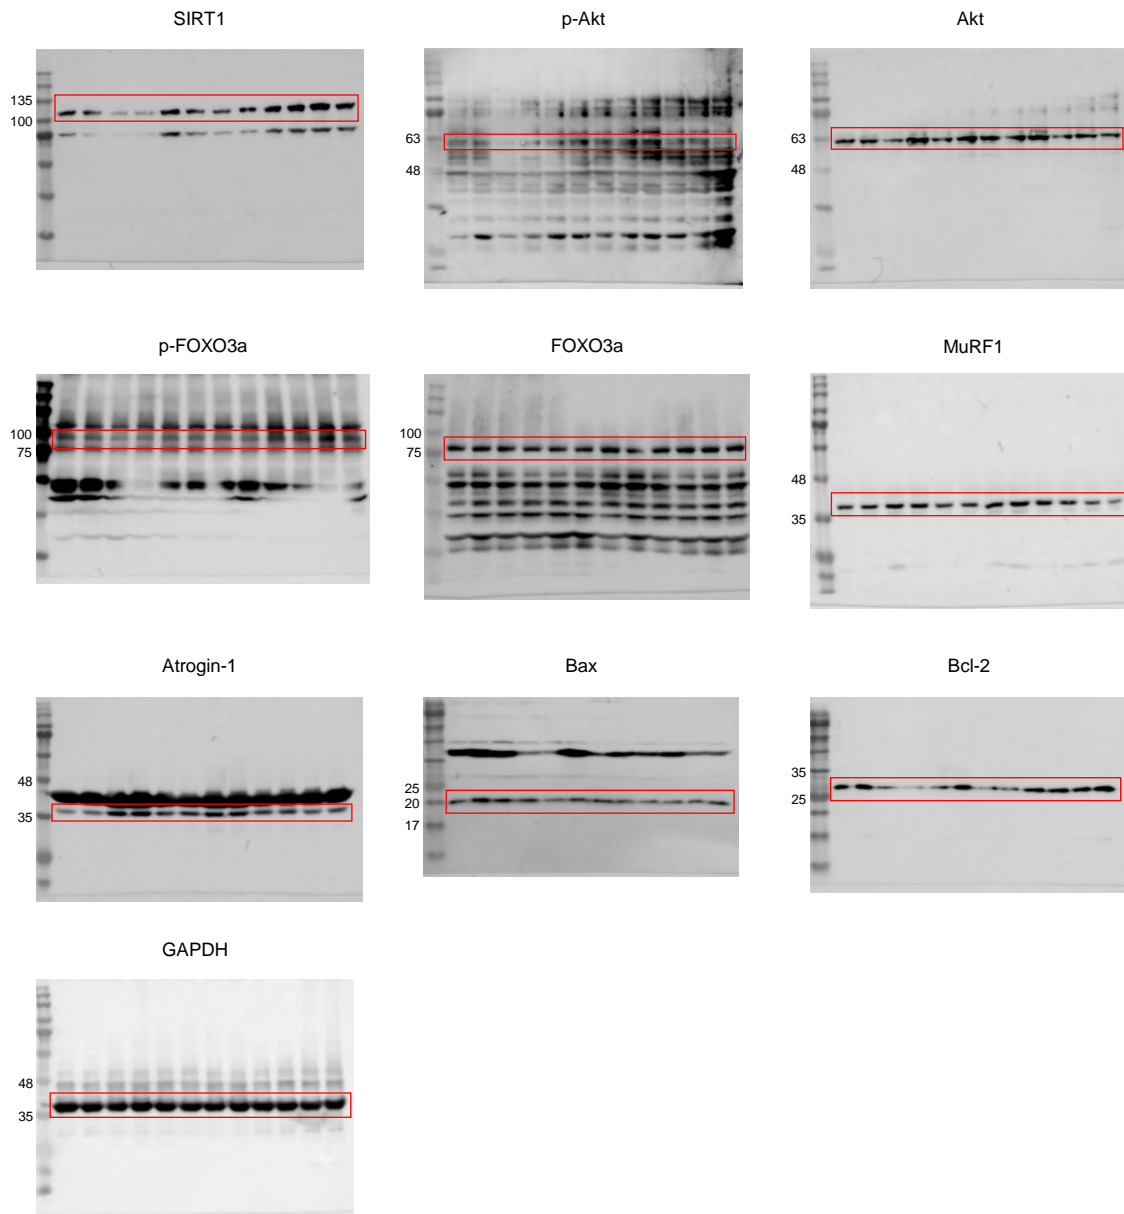

# The ARRIVE Essential 10: Compliance Questionnaire

Use this questionnaire to evaluate how well a manuscript complies with the ARRIVE Essential 10. It can be applied to any manuscript describing comparative experiments in living animals, by assessors such as journal staff, editors, or peer reviewers.

| Item                             | Question(s)                                                                                                                                   | Answers                                                                                                                                                           |
|----------------------------------|-----------------------------------------------------------------------------------------------------------------------------------------------|-------------------------------------------------------------------------------------------------------------------------------------------------------------------|
| 1 Study Design                   | Are all experimental and control groups clearly identified?                                                                                   | <input type="checkbox"/> Yes, for at least one experiment<br><input type="checkbox"/> No                                                                          |
|                                  | Is the experimental unit (e.g. an animal, litter or cage of animals) clearly identified?                                                      | <input type="checkbox"/> Yes, for at least one experiment<br><input type="checkbox"/> No                                                                          |
| 2 Sample Size                    | Is the exact number of experimental units in each group at the start of the study provided (e.g. in the format 'n=')?                         | <input type="checkbox"/> Yes, for at least one experiment<br><input type="checkbox"/> No                                                                          |
|                                  | Is the method by which the sample size was chosen explained?                                                                                  | <input type="checkbox"/> Yes, for at least one experiment<br><input type="checkbox"/> No                                                                          |
| 3 Inclusion & Exclusion Criteria | Are the criteria used for including and excluding animals, experimental units, or data points provided?                                       | <input type="checkbox"/> Yes, for at least one experiment<br><input type="checkbox"/> No                                                                          |
|                                  | Are any exclusions of animals, experimental units, or data points reported, or is there a statement indicating that there were no exclusions? | <input type="checkbox"/> Yes, for at least one analysis<br><input type="checkbox"/> No                                                                            |
| 4 Randomisation                  | Is the method by which experimental units were allocated to control and treatment groups described?                                           | <input type="checkbox"/> Yes, for at least one experiment<br><input type="checkbox"/> No                                                                          |
| 5 Blinding                       | Is it clear whether researchers were aware of, or blinded to, the group allocation at any stage of the experiment or data analysis?           | <input type="checkbox"/> Yes, for at least one experiment<br><input type="checkbox"/> No                                                                          |
| 6 Outcome Measures               | For all experimental outcomes presented, are details provided of exactly what parameter was measured?                                         | <input type="checkbox"/> Yes, for at least one experiment<br><input type="checkbox"/> No                                                                          |
| 7 Statistical Methods            | Is the statistical approach used to analyse each outcome detailed?                                                                            | <input type="checkbox"/> Yes, for at least one analysis<br><input type="checkbox"/> No                                                                            |
|                                  | Is there a description of any methods used to assess whether data met statistical assumptions?                                                | <input type="checkbox"/> Yes, for at least one analysis<br><input type="checkbox"/> No<br><input type="checkbox"/> Not applicable                                 |
|                                  |                                                                                                                                               |                                                                                                                                                                   |
| 8 Experimental Animals           | Are all species of animal used specified?                                                                                                     | <input type="checkbox"/> Yes, for at least one experiment<br><input type="checkbox"/> No                                                                          |
|                                  | Is the sex of the animals specified?                                                                                                          | <input type="checkbox"/> Yes, for at least one experiment<br><input type="checkbox"/> No<br><input type="checkbox"/> Not applicable to species                    |
|                                  | Is at least one of age, weight or developmental stage of the animals specified?                                                               | <input type="checkbox"/> Yes, for at least one experiment<br><input type="checkbox"/> No                                                                          |
|                                  |                                                                                                                                               |                                                                                                                                                                   |
| 9 Experimental Procedures        | Are both the timing and frequency with which procedures took place specified?                                                                 | <input type="checkbox"/> Yes, for at least one experiment<br><input type="checkbox"/> No                                                                          |
|                                  | Are details of acclimatisation periods to experimental locations provided?                                                                    | <input type="checkbox"/> Yes, for at least one experiment<br><input type="checkbox"/> No                                                                          |
| 10 Results                       | Are descriptive statistics for each experimental group provided, with a measure of variability (e.g. mean and SD, or median and range)?       | <input type="checkbox"/> Yes, for at least one experiment<br><input type="checkbox"/> No<br><input type="checkbox"/> Not applicable to the type of data collected |
|                                  | Is the effect size and confidence interval provided?                                                                                          | <input type="checkbox"/> Yes, for at least one experiment<br><input type="checkbox"/> No<br><input type="checkbox"/> Not applicable to the type of analysis used  |
|                                  |                                                                                                                                               |                                                                                                                                                                   |

## Notes on questionnaire design

The ARRIVE guidelines are a useful resource for authors preparing manuscripts describing animal research, and also provide a framework to evaluate the transparency of those manuscripts. To assess reporting quality, numerous studies have in the past sought to operationalise reporting guidelines (including ARRIVE). Typically, this involves scoring a manuscript's degree of compliance with guideline items in a binary fashion (e.g. an item is either not reported or reported) [1-3], a graded fashion (e.g. not, partially, or completely reported) [4,5], or a combination of the two [6].

This questionnaire has been designed to be as concise and user-friendly as possible. The number of questions used to assess a manuscript's compliance has been kept to a minimum, and in most cases each question is designed to be answered in a binary fashion. Compliance with some Essential 10 sub-items is inherently impossible to judge in this way, instead requiring a subjective judgement on the level of detail provided. For this reason, not all sub-items are represented by a question in this questionnaire.

To facilitate binary answers, it has been necessary to identify the minimum information in a manuscript sufficient to comply with each question. The strengths of this approach include the relatively short length of the questionnaire (and the correspondingly low time burden of using it), and the avoidance of ambiguity that would arise from a graded answering system, in which an intermediate score (e.g. 'partially/insufficiently reported') could denote a number of distinct deficiencies in compliance with an item (e.g. either only part of the item was complied with, or only the reporting of some experiments in the manuscript complied with the item.)

Limitations of this approach centre on the necessity to identify the minimum information sufficient to comply with each question. In some cases, this has resulted in questions that require a guideline sub-item's criteria to have been fulfilled in the reporting of only one experiment in a manuscript. As a result, not all experiments in a manuscript may be described in a way that fulfils that criterion, despite the manuscript being considered to comply with the guidelines overall.

## References

1. Hair *et al* (2020). *Res Integ Peer Rev*. doi: [10.1186/s41073-019-0069-3](https://doi.org/10.1186/s41073-019-0069-3)
2. Tihanyi *et al* (2019). *J Surg Res*. doi: [10.1016/j.jss.2018.10.038](https://doi.org/10.1016/j.jss.2018.10.038)
3. Zhao *et al* (2020). *BMC Vet Res*. doi: [10.1186/s12917-020-02664-1](https://doi.org/10.1186/s12917-020-02664-1)
4. Han *et al* (2017). *Plos One*. doi: [10.1371/journal.pone.0183591](https://doi.org/10.1371/journal.pone.0183591)
5. Chatzimanouil *et al* (2019). *J Am Soc Nephrol*. doi: [10.1681/ASN.2018050515](https://doi.org/10.1681/ASN.2018050515)
6. Leung *et al* (2018). *Plos One*. doi: [10.1371/journal.pone.0197882](https://doi.org/10.1371/journal.pone.0197882)
